# Supplementary material for: MAT2: manifold alignment of single-cell transcriptomes with cell triplets
Source: Oxford University Press journal article supplement (doi:10.1093/bioinformatics/btab250), 2021-04-21
Supplement: btab250_supplementary_data.zip [file btab250_supplementary_data.zip]

Archive with 2 entries (2 files):
- Supplementary_Figure_1-4.pdf
- Supplementary_Tables_S1-6.xlsx
