# Supplementary material for: MAT2: manifold alignment of single-cell transcriptomes with cell triplets
Source: Oxford University Press journal article supplement (doi:10.1093/bioinformatics/btab250), 2021-04-21
Supplement: btab250_supplementary_data.zip [file btab250_supplementary_data.zip › Supplementary_Tables_S1-6.xlsx]

## Sheet: S1. Data Source
Dataset	Batch	Ref.	URL
Retina	Drop-seq 1	Shekhar, K. et al. (2016). Comprehensive classification of retinal bipolar neurons by single-cell transcriptomics. Cell, 166(5), 1308–1323.e30.	https://www.ncbi.nlm.nih.gov/geo/query/acc.cgi?acc=GSE81904
	Drop-seq 2		Or: https://hemberg-lab.github.io/scRNA.seq.datasets/mouse/retina/
Pancreas	CelSeq	Muraro, M. J. et al. (2016). A single-cell transcriptome atlas of the human pancreas. Cell Syst., 3(4), 385–394.e3.	https://www.ncbi.nlm.nih.gov/geo/query/acc.cgi?acc=GSE81076
	CelSeq2	Grün, D. et al. (2016). De novo prediction of stem cell identity using single-cell transcriptome data. Cell Stem Cell, 19(2), 266–277.	https://www.ncbi.nlm.nih.gov/geo/query/acc.cgi?acc=GSE85241
	Fluidigm C1	Segerstolpe, Å. et al. (2016). Single-cell transcriptome profiling of human pancreatic islets in health and type 2 diabetes. Cell Metab., 24(4), 593–607.	https://www.ncbi.nlm.nih.gov/geo/query/acc.cgi?acc=GSE86469
	SMART-seq2	Lawlor, N. et al. (2017). Single-cell transcriptomes identify human islet cell signatures and reveal cell-type–specific expression changes in type 2 diabetes. Genome Res., 27(2), 208–222.	https://www.ebi.ac.uk/arrayexpress/experiments/E-MTAB-5061/
Hematopoietic	SMART-seq2	Paul, F. et al. (2015). Transcriptional heterogeneity and lineage commitment in myeloid progenitors. Cell, 163(7), 1663–1677.	https://www.ncbi.nlm.nih.gov/geo/query/acc.cgi?acc=GSE81682
	MARS-seq	Nestorowa, S. et al. (2016). A single-cell resolution map of mouse hematopoietic stem and progenitor cell differentiation. Blood, 128(8), e20–e31.	https://www.ncbi.nlm.nih.gov/geo/query/acc.cgi?acc=GSE72857
Embryo	STRT-seq_Human	Zeng, Y. et al. (2019). Tracing the first hematopoietic stem cell generation in human embryo by single-cell RNA sequencing. Cell Res., 29(11), 881–894.	https://www.ncbi.nlm.nih.gov/geo/query/acc.cgi?acc=GSE135202
	STRT-seq_Mouse	Hou, S. et al. (2020). Embryonic endothelial evolution towards first hematopoietic stem cells revealed by single-cell transcriptomic and functional analyses. Cell Res., 30(5), 376–392.	https://www.ncbi.nlm.nih.gov/geo/query/acc.cgi?acc=GSE139389

## Sheet: S2. Benchmark ARI
Method	Retina	Pancreas
raw data	0.935	0.511
MAT2-s	0.968	0.963
MAT2-u	0.957	0.933
scMerge-s	0.866	0.954
scMerge-u	0.398	0.84
INSCT-s	0.961	0.949
INSCT-u	0.94	0.887
Seurat	0.947	0.939
Harmony	0.938	0.83
scANVI	0.937	0.912

## Sheet: S3. Benchmark LISI
Method	Retina	Pancreas	Retina (scale)	Pancreas (scale)
raw data	1.397	1.309	0.773533	0.494149
MAT2-s	1.806	2.633	1	0.99396
MAT2-u	1.802	2.529	0.997785	0.9547
scMerge-s	1.771	1.37	0.98062	0.517176
scMerge-u	1.752	1.168	0.9701	0.440921
INSCT-s	1.722	1.921	0.953488	0.725179
INSCT-u	1.538	1.811	0.851606	0.683654
Seurat	1.64	2.649	0.908084	1
Harmony	1.793	2.551	0.992802	0.963005
scANVI	1.696	1.911	0.939092	0.721404

## Sheet: S4. ARI-CellNum (%)
Percentage	Dataset	CellNum	ARI	Method
5	Retina	1324	0.931	MAT2-s
10	Retina	2648	0.951	MAT2-s
20	Retina	5297	0.957	MAT2-s
50	Retina	13242	0.957	MAT2-s
100	Retina	26485	0.968	MAT2-s
5	Pancreas	316	0.924	MAT2-s
10	Pancreas	632	0.932	MAT2-s
25	Pancreas	1580	0.943	MAT2-s
50	Pancreas	3160	0.953	MAT2-s
100	Pancreas	6321	0.963	MAT2-s
5	Retina	1324	0.912	INSCT-s
10	Retina	2648	0.926	INSCT-s
20	Retina	5297	0.931	INSCT-s
50	Retina	13242	0.936	INSCT-s
100	Retina	26485	0.961	INSCT-s
15	Pancreas	948	0.592	INSCT-s
25	Pancreas	1580	0.676	INSCT-s
50	Pancreas	3160	0.787	INSCT-s
100	Pancreas	6321	0.949	INSCT-s
5	Retina	1324	0.862	scANVI
10	Retina	2648	0.826	scANVI
20	Retina	5297	0.809	scANVI
50	Retina	13242	0.891	scANVI
100	Retina	26485	0.937	scANVI
5	Pancreas	316	0.896	scANVI
10	Pancreas	632	0.892	scANVI
25	Pancreas	1580	0.899	scANVI
50	Pancreas	3160	0.912	scANVI
100	Pancreas	6321	0.912	scANVI

## Sheet: S5. Benchmark Time (sec)
Method	Cells	Wall Time (sec)	CPU Time (sec)
Seurat	4000	32.0537	46.097
Harmony	4000	13.5303	52.71
scMerge-s	4000	662.654	1092.41
scMerge-u	4000	728.948	1217.1
MAT2-s	4000	21.0835	20.622
MAT2-u	4000	34.7815	39.385
INSCT-s	4000	31.1543	47.4367
INSCT-u	4000	24.3657	40.85
scANVI	4000	33.195	374.191
MAT2-s (Without GPU)	4000	37.525	443.993
MAT2-u (Without GPU)	4000	50.1015	327.985
INSCT-s (Without GPU)	4000	26.6353	55.2977
INSCT-u (Without GPU)	4000	27.409	55.961
scANVI (Without GPU)	4000	66.61	795.039
Seurat	6000	45.1603	81.1355
Harmony	6000	17.2457	60.123
scMerge-s	6000	1076.3	2936.09
scMerge-u	6000	1215.57	3157.93
MAT2-s	6000	25.6935	27.1435
MAT2-u	6000	44.8515	68.445
INSCT-s	6000	37.1817	68.88
INSCT-u	6000	28.1417	54.7857
scANVI	6000	45.721	546.045
MAT2-s (Without GPU)	6000	52.8453	626.294
MAT2-u (Without GPU)	6000	61.6875	404.566
INSCT-s (Without GPU)	6000	36.1947	83.0247
INSCT-u (Without GPU)	6000	31.927	75.395
scANVI (Without GPU)	6000	99.396	1191.55
Seurat	10000	84.1303	159.034
Harmony	10000	29.725	108.566
scMerge-s	10000	1935.36	5809.8
scMerge-u	10000	2313.44	6595.06
MAT2-s	10000	30.6385	32.9965
MAT2-u	10000	68.8825	119.151
INSCT-s	10000	61.0837	111.97
INSCT-u	10000	50.4183	96.61
scANVI	10000	76.9307	920.649
MAT2-s (Without GPU)	10000	85.5027	914.236
MAT2-u (Without GPU)	10000	114.199	668.923
INSCT-s (Without GPU)	10000	57.003	129.528
INSCT-u (Without GPU)	10000	58.082	135.56
scANVI (Without GPU)	10000	143.823	1722.95
Seurat	20000	227.091	421.34
Harmony	20000	60.5317	209.264
scMerge-s	20000	3657.43	8570.57
scMerge-u	20000	5125.68	10067.6
MAT2-s	20000	65.5725	80.198
MAT2-u	20000	205.523	359.89
INSCT-s	20000	106.79	227.966
INSCT-u	20000	54.4577	135.656
scANVI	20000	151.181	1806.45
MAT2-s (Without GPU)	20000	152.352	1811.62
MAT2-u (Without GPU)	20000	284.864	1467.99
INSCT-s (Without GPU)	20000	91.332	236.713
INSCT-u (Without GPU)	20000	57.433	170.882
scANVI (Without GPU)	20000	329.629	3945.99
Seurat	40000	747.284	1264.59
Harmony	40000	122.526	355.195
scMerge-s	40000	6913.6	13532.9
scMerge-u	40000	12463.2	18872.4
MAT2-s	40000	122.335	155.365
MAT2-u	40000	710.055	1178.87
INSCT-s	40000	185.028	389.411
INSCT-u	40000	76.8457	208.087
scANVI	40000	348.724	4087
MAT2-s (Without GPU)	40000	300.83	3568.05
MAT2-u (Without GPU)	40000	858.855	3179.29
INSCT-s (Without GPU)	40000	159.662	399.405
INSCT-u (Without GPU)	40000	82.8083	252.539
scANVI (Without GPU)	40000	659.135	7890.63
Seurat	80000	2178.82	3990.15
Harmony	80000	213.473	791.278
scMerge-s	80000
scMerge-u	80000
MAT2-s	80000	236.68	306.656
MAT2-u	80000	1944.01	3833.15
INSCT-s	80000	406.63	823.874
INSCT-u	80000	89.4997	317.565
scANVI	80000	631.357	7487.03
MAT2-s (Without GPU)	80000	606.449	7167.21
MAT2-u (Without GPU)	80000	2225.54	7585.8
INSCT-s (Without GPU)	80000	412.472	959.34
INSCT-u (Without GPU)	80000	97.5623	364.955
scANVI (Without GPU)	80000	1308.98	15507.5
Seurat	120000	3819.03	8499.79
Harmony	120000	335.99	1074.49
scMerge-s	120000
scMerge-u	120000
MAT2-s	120000	367.041	441.034
MAT2-u	120000	3703.01	8236.65
INSCT-s	120000	721.784	1358.59
INSCT-u	120000	87.7877	391.109
scANVI	120000	904.767	10778.8
MAT2-s (Without GPU)	120000	913.533	10757.1
MAT2-u (Without GPU)	120000	4120.8	13724.7
INSCT-s (Without GPU)	120000	753.933	1613.09
INSCT-u (Without GPU)	120000	109.848	471.815
scANVI (Without GPU)	120000	1972.67	23125.1

## Sheet: S6. Benchmark Memory (GB)
Method	Cells	Memory (GB)
Seurat	4000	4.326
Harmony	4000	2.562
scMerge-s	4000	13.062
scMerge-u	4000	13.314
MAT2-s	4000	2.058
MAT2-u	4000	2.142
INSCT-s	4000	1.554
INSCT-u	4000	1.554
scANVI	4000	2.772
MAT2-s (Without GPU)	4000	0.504
MAT2-u (Without GPU)	4000	2.142
INSCT-s (Without GPU)	4000	0.504
INSCT-u (Without GPU)	4000	0.504
scANVI (Without GPU)	4000	1.134
Seurat	6000	5.628
Harmony	6000	3.276
scMerge-s	6000	16.422
scMerge-u	6000	17.682
MAT2-s	6000	2.142
MAT2-u	6000	2.835
INSCT-s	6000	1.638
INSCT-u	6000	1.638
scANVI	6000	2.898
MAT2-s (Without GPU)	6000	0.63
MAT2-u (Without GPU)	6000	2.835
INSCT-s (Without GPU)	6000	0.63
INSCT-u (Without GPU)	6000	0.63
scANVI (Without GPU)	6000	1.638
Seurat	10000	8.82
Harmony	10000	6.09
scMerge-s	10000	35.28
scMerge-u	10000	36.75
MAT2-s	10000	2.184
MAT2-u	10000	3.465
INSCT-s	10000	1.722
INSCT-u	10000	1.722
scANVI	10000	3.024
MAT2-s (Without GPU)	10000	0.63
MAT2-u (Without GPU)	10000	3.465
INSCT-s (Without GPU)	10000	0.756
INSCT-u (Without GPU)	10000	0.756
scANVI (Without GPU)	10000	1.764
Seurat	20000	17.304
Harmony	20000	11.088
scMerge-s	20000	68.67
scMerge-u	20000	69.552
MAT2-s	20000	2.772
MAT2-u	20000	6.237
INSCT-s	20000	1.848
INSCT-u	20000	1.89
scANVI	20000	3.465
MAT2-s (Without GPU)	20000	1.26
MAT2-u (Without GPU)	20000	6.237
INSCT-s (Without GPU)	20000	0.882
INSCT-u (Without GPU)	20000	1.071
scANVI (Without GPU)	20000	3.717
Seurat	40000	36.456
Harmony	40000	20.664
scMerge-s	40000	122.808
scMerge-u	40000	123.102
MAT2-s	40000	3.696
MAT2-u	40000	13.671
INSCT-s	40000	2.31
INSCT-u	40000	2.394
scANVI	40000	4.095
MAT2-s (Without GPU)	40000	2.52
MAT2-u (Without GPU)	40000	13.671
INSCT-s (Without GPU)	40000	1.386
INSCT-u (Without GPU)	40000	1.386
scANVI (Without GPU)	40000	7.434
Seurat	80000	62.664
Harmony	80000	39.816
scMerge-s	80000
scMerge-u	80000
MAT2-s	80000	6.174
MAT2-u	80000	25.578
INSCT-s	80000	3.066
INSCT-u	80000	2.982
scANVI	80000	5.082
MAT2-s (Without GPU)	80000	5.544
MAT2-u (Without GPU)	80000	25.578
INSCT-s (Without GPU)	80000	2.142
INSCT-u (Without GPU)	80000	2.142
scANVI (Without GPU)	80000	15.246
Seurat	120000	104.118
Harmony	120000	59.136
scMerge-s	120000
scMerge-u	120000
MAT2-s	120000	10.626
MAT2-u	120000	59.535
INSCT-s	120000	4.116
INSCT-u	120000	4.536
scANVI	120000	6.615
MAT2-s (Without GPU)	120000	10.899
MAT2-u (Without GPU)	120000	59.535
INSCT-s (Without GPU)	120000	3.78
INSCT-u (Without GPU)	120000	3.843
scANVI (Without GPU)	120000	22.743
